# Supplementary material for: ZBTB34 is a hepatocellular carcinoma-associated protein with a monopartite nuclear localization signal
Source: Aging (Albany NY). 2023 Aug 30;15(16):8487–500. doi: 10.18632/aging.204987 (PMC10496988; doi:10.18632/aging.204987)
Supplement: Supplementary Table 1 [file aging-15-204987-s001.pdf]

## SUPPLEMENTARY TABLE

**Supplementary Table 1. The primers used in this study.**

| Primers              | Sequences (5'→3')                                   | Purpose    |
|----------------------|-----------------------------------------------------|------------|
| ZBTB34 cDNA          | Forward: CTCGAG ATGGAAAGCACCTGG                     | ZBTB34     |
|                      | Reverse: GAGCTCTTAGTCAGGCGCATC                      | ZBTB34     |
| NLS <sub>A</sub>     | Forward: CTTGCTGCTGCTGCTGCTGCTGCTGCTGCTGCTGCTGCTGTC | NLS        |
|                      | Reverse: AGCAGCAGCAGCAGCAGCAGCAGCAGCAGCAGCGAAGCAGC  | NLS        |
| NLS <sub>M1</sub>    | Forward: GCTGCTTCAGCGGCCGTGG                        | R334       |
|                      | Reverse: GCTGAAGCAGCTCAGC                           | R334       |
| NLS <sub>M2</sub>    | Forward: CGAGGCGCTGGGGCCCGCCAG                      | R336       |
|                      | Reverse: AGCGCCTCGGAAGCAGCTC                        | R336       |
| NLS <sub>M3</sub>    | Forward: GGCCGCTCAGAAGCGAGC                         | R339       |
|                      | Reverse: AGCGGCCCCACGGCCTCG                         | R339       |
| NLS <sub>M4</sub>    | Forward: CCCGCCAGGCTCGAGCTCTGTCTG                   | K341       |
|                      | Reverse: AGCCTGGCGGGCCCCACGG                        | K341       |
| NLS <sub>M5</sub>    | Forward: CCAGAAGCGAGCTCTGTCTGTTC                    | R342       |
|                      | Reverse: AGCCTTCTGGCGGGCCCCACGG                     | R342       |
| siRNA 1              | Guide: UUCACUAAGCUAAAUUCAGCA                        | ZBTB34     |
|                      | Passenger: CUGAAUUUAGCUUAGUGAAGG                    | ZBTB34     |
| siRNA 2              | Guide: AACAGAAAAUAACCAUUAGAA                        | ZBTB34     |
|                      | Passenger: CUA AUGGUUAUUUUCUGUUGA                   | ZBTB34     |
| miR-125b-5p-F        | ACACTCCAGCTGGGTCCCTGAGACCCTAACT                     | qPCR       |
| miRNA-125b-5p-R      | CTCAACTGGTGTCTGTGA                                  | qPCR       |
| U6-F                 | CTCGCTTCGGCAGCACA                                   | qPCR       |
| U6-R                 | AACGCTTCACGAATTTGCGT                                | qPCR       |
| MiR125-125b-5p siRNA | AACCTGAAGATCTTCAACAACCCTGTCTC                       | Ago-mir    |
| MiR125-125b-5p siRNA | AAGTTGTTGAAGATCTTCAGGCCTGTCTC                       | Ago-mir    |
| MiR125-125b-5p siRNA | TCTACCTTGCCTTCAGATTCATAAT                           | Antago-mir |
| MiR125-125b-5p siRNA | TGACTCTTGGACTTGTTCATCCTCCC                          | Antago-mir |
| ZBTB10-F             | CGGCTCCACGAACAATAACG                                | qPCR       |
| ZBTB10-F             | CAGGCCCTCCAATTCCACTT                                | qPCR       |
| POLR1B-F             | TCCGAATGTTGATTATGCCTCG                              | qPCR       |
| POLR1B-R             | TGACAGCGGAATGTTCTTCCC                               | qPCR       |
| AUH-F                | ATTGGCGATTATTCCTGGTGG                               | qPCR       |
| AUH-R                | GAACGTGGCTGATTAAGCCCA                               | qPCR       |
| CDKN1A-F             | TGTCCGTCAGAACCCATGC                                 | qPCR       |
| CDKN1A-R             | AAAGTCGAAGTTCCATCGCTC                               | qPCR       |
| MYLIP-F              | GCAGGCGACTGGGAATCATAG                               | qPCR       |
| MYLIP-R              | CGGTTTCTCAGGTTTAGCCAT                               | qPCR       |
| EHMT1-F              | CATGCAGCCAGTAAAGATCCC                               | qPCR       |
| EHMT1-R              | CTGCTGTCGTCCAAAGTCAG                                | qPCR       |
| HMGB4-F              | TCGACAAAGCCCGATACCAG                                | qPCR       |
| HMGB4-R              | TCTTGGCAGAAGAGTAGGAAGG                              | qPCR       |
| LGALS4-F             | CGACGCTGCCTTACTACCAG                                | qPCR       |
| LGALS4-R             | CCAACCACAAAGTTCACGAAGA                              | qPCR       |
| GAPDH-F              | GCACCGTCAAGGCTGAGAAC                                | Control    |
| GAPDH-R              | TGGTGAAGACGCCAGTGGA                                 | Control    |
